# Supplementary material for: The Effects of Genotype × Environment on Physicochemical and Sensory Properties and Differences of Volatile Organic Compounds of Three Rice Types (Oryza sativa L.)
Source: MDPI journal article supplement (doi:10.3390/foods12163108), 2023-08-18
Supplement: s1 [file s1]

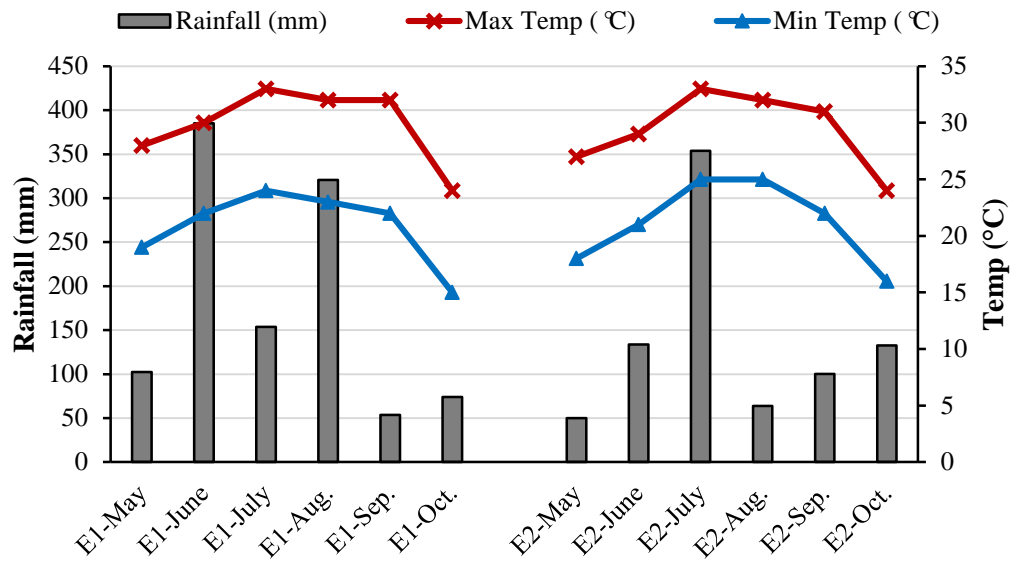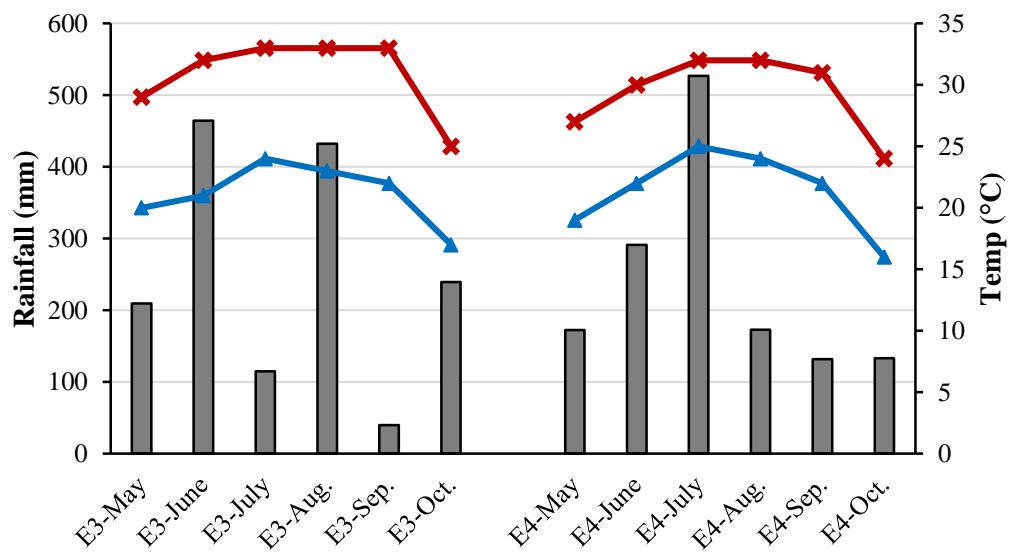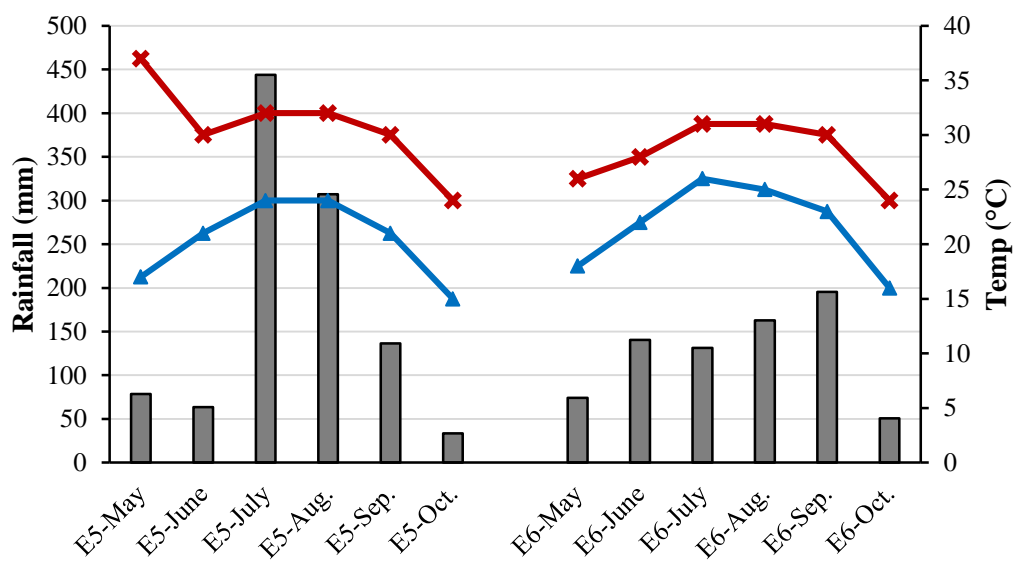

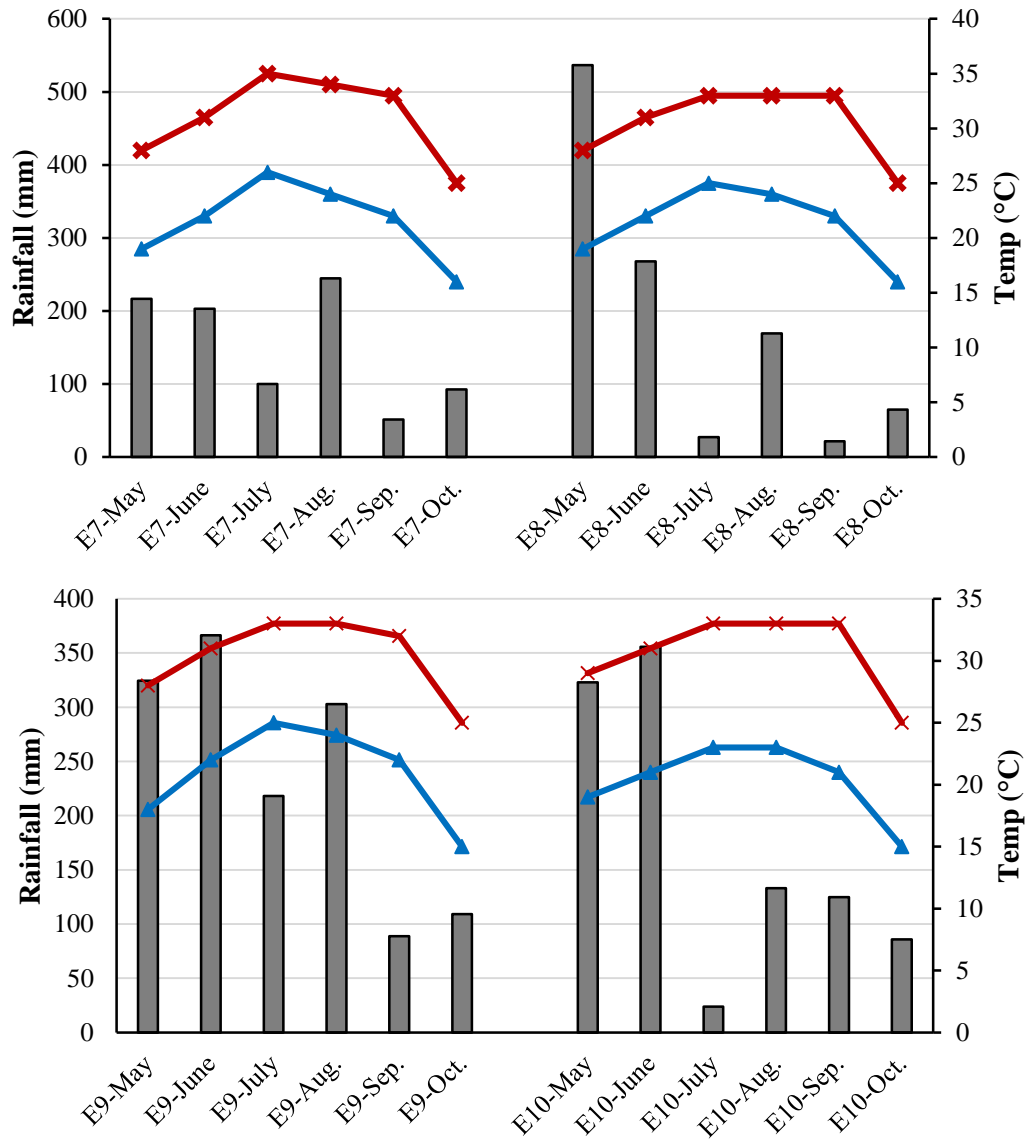

Supplementary Figure S1. Weather conditions per month during the period of rice growth in the ten environments.

Max Temp, the average of the maximum temperature per month; Min Temp, the average of the minimum temperature per month; Rainfall, total rainfall per month; E1–E10 indicates the ten environments.

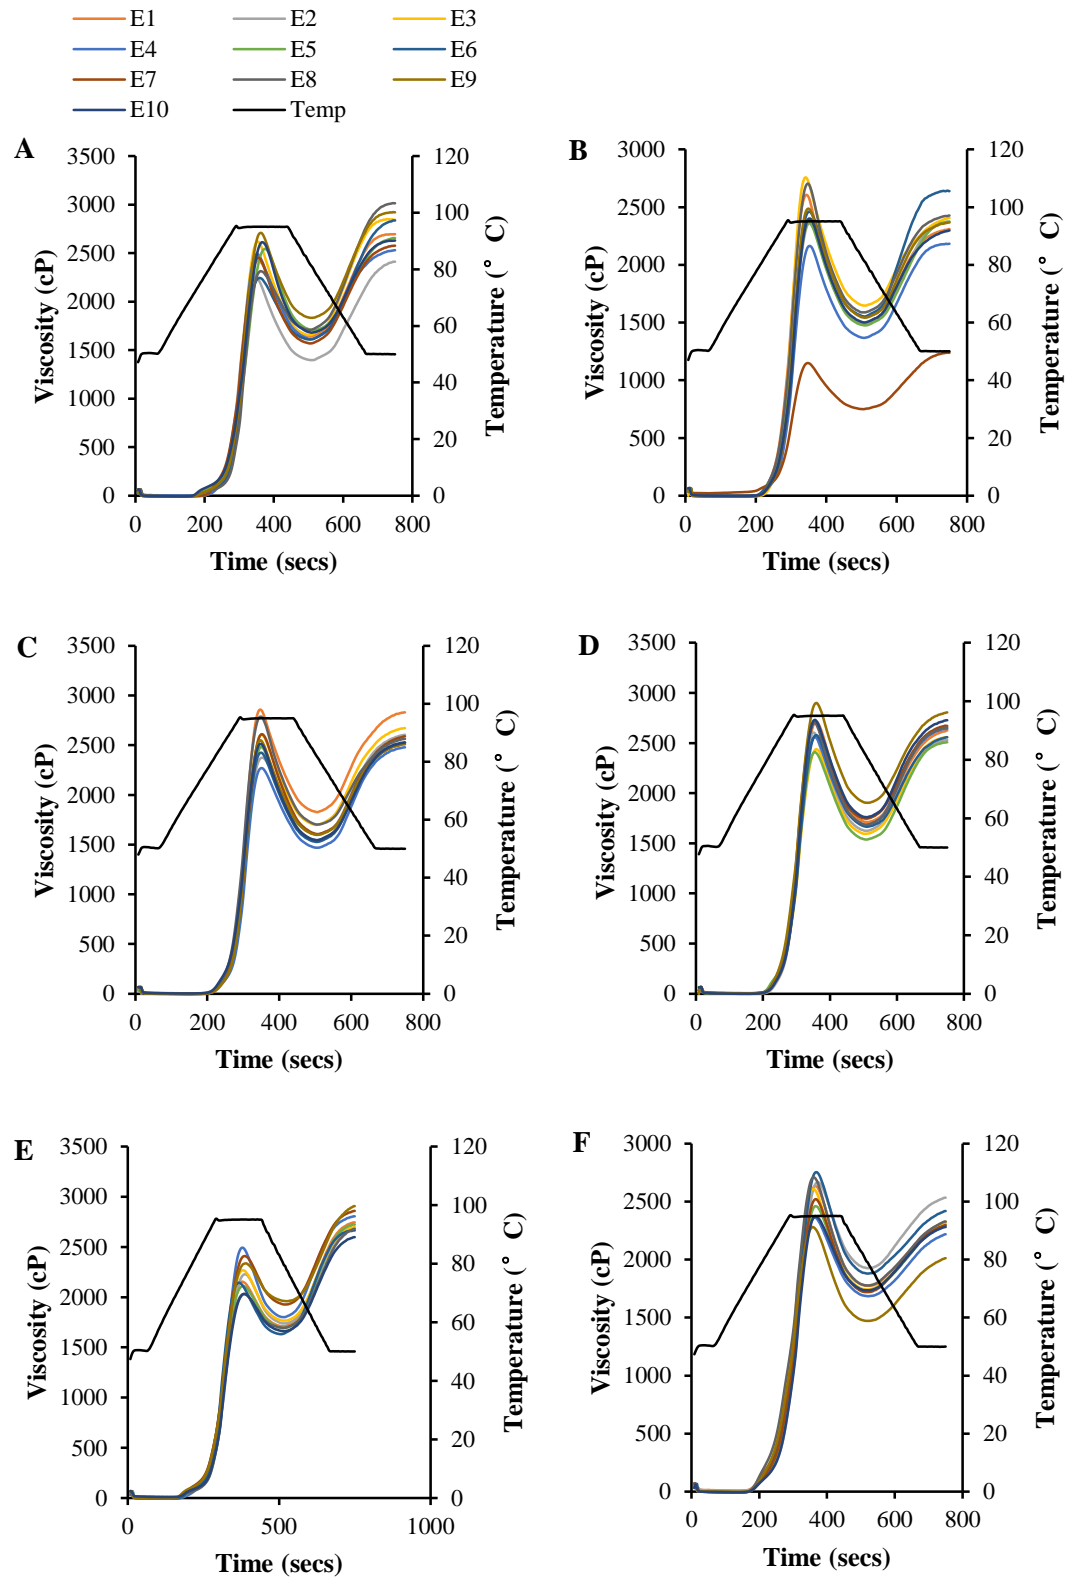

Supplementary Figure S2. The RVA profile of the six rice varieties under ten environments. A. HZY261; B. ZZY8; C. JFY2; D. YY15; E. JHX1; F. NJ46.

Supplementary Table S1. The information of the six rice varieties and ten environments <sup>a</sup>

| Sample No. | Genotype | Environment | City     | Location          | Type                   |
|------------|----------|-------------|----------|-------------------|------------------------|
| 1          | HZY261   | E1          | Hangzhou | 119.1 °E, 29.3 °N | <i>Indica</i>          |
| 2          | HZY261   | E2          | Ningbo   | 121.2 °E, 30.2 °N | <i>Indica</i>          |
| 3          | HZY261   | E3          | Wenzhou  | 120.0 °E, 27.9 °N | <i>Indica</i>          |
| 4          | HZY261   | E4          | Shaoxing | 120.8 °E, 30.0 °N | <i>Indica</i>          |
| 5          | HZY261   | E5          | Huzhou   | 120.3 °E, 30.6 °N | <i>Indica</i>          |
| 6          | HZY261   | E6          | Jiaxing  | 120.9 °E, 30.8 °N | <i>Indica</i>          |
| 7          | HZY261   | E7          | Jinhua   | 119.6 °E, 28.7 °N | <i>Indica</i>          |
| 8          | HZY261   | E8          | Quzhou   | 118.6 °E, 29.0 °N | <i>Indica</i>          |
| 9          | HZY261   | E9          | Taizhou  | 120.8 °E, 28.7 °N | <i>Indica</i>          |
| 10         | HZY261   | E10         | Lishui   | 118.9 °E, 27.8 °N | <i>Indica</i>          |
| 11         | ZZY8     | E1          | Hangzhou | 119.1 °E, 29.3 °N | <i>Indica</i>          |
| 12         | ZZY8     | E2          | Ningbo   | 121.2 °E, 30.2 °N | <i>Indica</i>          |
| 13         | ZZY8     | E3          | Wenzhou  | 120.0 °E, 27.9 °N | <i>Indica</i>          |
| 14         | ZZY8     | E4          | Shaoxing | 120.8 °E, 30.0 °N | <i>Indica</i>          |
| 15         | ZZY8     | E5          | Huzhou   | 120.3 °E, 30.6 °N | <i>Indica</i>          |
| 16         | ZZY8     | E6          | Jiaxing  | 120.9 °E, 30.8 °N | <i>Indica</i>          |
| 17         | ZZY8     | E7          | Jinhua   | 119.6 °E, 28.7 °N | <i>Indica</i>          |
| 18         | ZZY8     | E8          | Quzhou   | 118.6 °E, 29.0 °N | <i>Indica</i>          |
| 19         | ZZY8     | E9          | Taizhou  | 120.8 °E, 28.7 °N | <i>Indica</i>          |
| 20         | ZZY8     | E10         | Lishui   | 118.9 °E, 27.8 °N | <i>Indica</i>          |
| 21         | JFY2     | E1          | Hangzhou | 119.1 °E, 29.3 °N | <i>Indica-japonica</i> |
| 22         | JFY2     | E2          | Ningbo   | 121.2 °E, 30.2 °N | <i>Indica-japonica</i> |
| 23         | JFY2     | E3          | Wenzhou  | 120.0 °E, 27.9 °N | <i>Indica-japonica</i> |
| 24         | JFY2     | E4          | Shaoxing | 120.8 °E, 30.0 °N | <i>Indica-japonica</i> |
| 25         | JFY2     | E5          | Huzhou   | 120.3 °E, 30.6 °N | <i>Indica-japonica</i> |
| 26         | JFY2     | E6          | Jiaxing  | 120.9 °E, 30.8 °N | <i>Indica-japonica</i> |
| 27         | JFY2     | E7          | Jinhua   | 119.6 °E, 28.7 °N | <i>Indica-japonica</i> |
| 28         | JFY2     | E8          | Quzhou   | 118.6 °E, 29.0 °N | <i>Indica-japonica</i> |
| 29         | JFY2     | E9          | Taizhou  | 120.8 °E, 28.7 °N | <i>Indica-japonica</i> |
| 30         | JFY2     | E10         | Lishui   | 118.9 °E, 27.8 °N | <i>Indica-japonica</i> |
| 31         | YY15     | E1          | Hangzhou | 119.1 °E, 29.3 °N | <i>Indica-japonica</i> |
| 32         | YY15     | E2          | Ningbo   | 121.2 °E, 30.2 °N | <i>Indica-japonica</i> |
| 33         | YY15     | E3          | Wenzhou  | 120.0 °E, 27.9 °N | <i>Indica-japonica</i> |
| 34         | YY15     | E4          | Shaoxing | 120.8 °E, 30.0 °N | <i>Indica-japonica</i> |
| 35         | YY15     | E5          | Huzhou   | 120.3 °E, 30.6 °N | <i>Indica-japonica</i> |

| Sample No. | Genotype | Environment | City     | Location        | Type                   |
|------------|----------|-------------|----------|-----------------|------------------------|
| 36         | YY15     | E6          | Jiaxing  | 120.9 E, 30.8 N | <i>Indica-japonica</i> |
| 37         | YY15     | E7          | Jinhua   | 119.6 E, 28.7 N | <i>Indica-japonica</i> |
| 38         | YY15     | E8          | Quzhou   | 118.6 E, 29.0 N | <i>Indica-japonica</i> |
| 39         | YY15     | E9          | Taizhou  | 120.8 E, 28.7 N | <i>Indica-japonica</i> |
| 40         | YY15     | E10         | Lishui   | 118.9 E, 27.8 N | <i>Indica-japonica</i> |
| 41         | JHX1     | E1          | Hangzhou | 119.1 E, 29.3 N | <i>Japonica</i>        |
| 42         | JHX1     | E2          | Ningbo   | 121.2 E, 30.2 N | <i>Japonica</i>        |
| 43         | JHX1     | E3          | Wenzhou  | 120.0 E, 27.9 N | <i>Japonica</i>        |
| 44         | JHX1     | E4          | Shaoxing | 120.8 E, 30.0 N | <i>Japonica</i>        |
| 45         | JHX1     | E5          | Huzhou   | 120.3 E, 30.6 N | <i>Japonica</i>        |
| 46         | JHX1     | E6          | Jiaxing  | 120.9 E, 30.8 N | <i>Japonica</i>        |
| 47         | JHX1     | E7          | Jinhua   | 119.6 E, 28.7 N | <i>Japonica</i>        |
| 48         | JHX1     | E8          | Quzhou   | 118.6 E, 29.0 N | <i>Japonica</i>        |
| 49         | JHX1     | E9          | Taizhou  | 120.8 E, 28.7 N | <i>Japonica</i>        |
| 50         | JHX1     | E10         | Lishui   | 118.9 E, 27.8 N | <i>Japonica</i>        |
| 51         | NJ46     | E1          | Hangzhou | 119.1 E, 29.3 N | <i>Japonica</i>        |
| 52         | NJ46     | E2          | Ningbo   | 121.2 E, 30.2 N | <i>Japonica</i>        |
| 53         | NJ46     | E3          | Wenzhou  | 120.0 E, 27.9 N | <i>Japonica</i>        |
| 54         | NJ46     | E4          | Shaoxing | 120.8 E, 30.0 N | <i>Japonica</i>        |
| 55         | NJ46     | E5          | Huzhou   | 120.3 E, 30.6 N | <i>Japonica</i>        |
| 56         | NJ46     | E6          | Jiaxing  | 120.9 E, 30.8 N | <i>Japonica</i>        |
| 57         | NJ46     | E7          | Jinhua   | 119.6 E, 28.7 N | <i>Japonica</i>        |
| 58         | NJ46     | E8          | Quzhou   | 118.6 E, 29.0 N | <i>Japonica</i>        |
| 59         | NJ46     | E9          | Taizhou  | 120.8 E, 28.7 N | <i>Japonica</i>        |
| 60         | NJ46     | E10         | Lishui   | 118.9 E, 27.8 N | <i>Japonica</i>        |

a HZY261, huazheyoun261; ZZY8, zhongzheyoun8; JFY2, jiafengyou2; YY15, yongyou15; JHX1, jiahexiang1; NJ46, nanjing46; E1-E10, the ten environments, respectively.

Supplementary Table S2. The sensitive evaluations of the cooked rice of six rice varieties under ten environments <sup>a</sup>

|                    | <b>FCR</b>             | <b>ACR</b>             | <b>PCR</b>            | <b>TCR</b>              | <b>TCCR</b>           | <b>SEV</b>             |
|--------------------|------------------------|------------------------|-----------------------|-------------------------|-----------------------|------------------------|
| <b>Genotype</b>    |                        |                        |                       |                         |                       |                        |
| HZY261             | 17.1±1.3 <sup>A</sup>  | 17.3±1.2 <sup>A</sup>  | 25.1±2.0 <sup>A</sup> | 21.3±1.6 <sup>A</sup>   | 4.3±0.3 <sup>A</sup>  | 85.1±3.7 <sup>A</sup>  |
| ZZY8               | 16.8±1.6 <sup>AB</sup> | 16.5±1.3 <sup>BC</sup> | 25.1±2.0 <sup>A</sup> | 21.1±1.7 <sup>AB</sup>  | 4.2±0.4 <sup>AB</sup> | 83.6±5.1 <sup>AB</sup> |
| JFY2               | 16.9±1.3 <sup>AB</sup> | 16.4±1.3 <sup>C</sup>  | 24.6±1.9 <sup>A</sup> | 20.6±1.6 <sup>BC</sup>  | 4.2±0.4 <sup>AB</sup> | 82.7±3.8 <sup>BC</sup> |
| YY15               | 17.0±1.5 <sup>AB</sup> | 16.9±1.3 <sup>B</sup>  | 24.8±2.2 <sup>A</sup> | 20.8±1.8 <sup>A-C</sup> | 4.2±0.3 <sup>AB</sup> | 83.6±5.0 <sup>AB</sup> |
| JHX1               | 16.4±1.7 <sup>B</sup>  | 15.9±1.0 <sup>D</sup>  | 23.0±3.5 <sup>B</sup> | 20.6±1.6 <sup>BC</sup>  | 4.0±0.4 <sup>BC</sup> | 79.8±5.0 <sup>D</sup>  |
| NJ46               | 16.6±1.5 <sup>AB</sup> | 16.2±1.2 <sup>CD</sup> | 24.4±1.9 <sup>A</sup> | 20.3±2.0 <sup>C</sup>   | 4.0±0.4 <sup>C</sup>  | 81.6±4.2 <sup>C</sup>  |
| <b>Environment</b> |                        |                        |                       |                         |                       |                        |
| E1                 | 17.3±1.2 <sup>A</sup>  | 16.5±1.3 <sup>AB</sup> | 24.4±2.2 <sup>A</sup> | 21.1±1.6 <sup>A</sup>   | 4.2±0.4 <sup>A</sup>  | 83.5±4.2 <sup>AB</sup> |
| E2                 | 16.1±1.9 <sup>B</sup>  | 16.2±1.2 <sup>B</sup>  | 24.3±2.1 <sup>A</sup> | 20.4±1.6 <sup>A</sup>   | 4.0±0.4 <sup>A</sup>  | 81.0±5.3 <sup>B</sup>  |
| E3                 | 16.7±1.4 <sup>AB</sup> | 16.4±1.3 <sup>AB</sup> | 24.5±1.9 <sup>A</sup> | 20.4±1.8 <sup>A</sup>   | 4.0±0.4 <sup>A</sup>  | 82.1±4.6 <sup>AB</sup> |
| E4                 | 16.5±1.3 <sup>AB</sup> | 16.5±1.3 <sup>AB</sup> | 24.0±2.0 <sup>A</sup> | 20.8±1.7 <sup>A</sup>   | 4.2±0.4 <sup>A</sup>  | 82.0±4.6 <sup>AB</sup> |
| E5                 | 17.0±1.3 <sup>A</sup>  | 16.4±1.3 <sup>AB</sup> | 23.8±4.6 <sup>A</sup> | 20.9±1.7 <sup>A</sup>   | 4.1±0.4 <sup>A</sup>  | 82.3±6.2 <sup>AB</sup> |
| E6                 | 17.2±1.2 <sup>A</sup>  | 17.0±1.3 <sup>A</sup>  | 25.2±2.0 <sup>A</sup> | 20.9±1.7 <sup>A</sup>   | 4.2±0.3 <sup>A</sup>  | 84.4±3.6 <sup>A</sup>  |
| E7                 | 17.2±1.3 <sup>A</sup>  | 16.1±1.2 <sup>B</sup>  | 24.7±1.9 <sup>A</sup> | 21.0±1.7 <sup>A</sup>   | 4.2±0.3 <sup>A</sup>  | 83.1±3.5 <sup>AB</sup> |
| E8                 | 16.7±1.5 <sup>AB</sup> | 16.8±1.3 <sup>AB</sup> | 24.9±2.0 <sup>A</sup> | 20.9±1.7 <sup>A</sup>   | 4.2±0.4 <sup>A</sup>  | 83.5±4.4 <sup>AB</sup> |
| E9                 | 16.5±2.0 <sup>AB</sup> | 16.7±1.3 <sup>AB</sup> | 24.4±1.9 <sup>A</sup> | 20.2±2.0 <sup>A</sup>   | 4.1±0.5 <sup>A</sup>  | 81.9±6.0 <sup>AB</sup> |
| E10                | 16.9±1.7 <sup>AB</sup> | 16.6±1.3 <sup>AB</sup> | 24.9±2.1 <sup>A</sup> | 21.0±1.9 <sup>A</sup>   | 4.2±0.3 <sup>A</sup>  | 83.5±5.3 <sup>AB</sup> |

<sup>a</sup> The results are presented as mean ± standard deviation on 100-point scale, and values in each column of genotype or environment with different letters are significantly different (P < 0.05). FCR, flavor of cooked rice; ACR, appearance of cooked rice; PCR: palatability of cooked rice; TCR, taste of cooked rice; TCCR, texture of cooled cooked rice; SEV, sensitive evaluation value.

Supplementary Table S3. The compound information corresponding to the selected characteristic signals <sup>a</sup>

| Category  | Signal No. | Compounds           | Retention time (s) | Drift time (ms) | Intensity values of characteristic peaks / V |       |          |       |        |       |        |       |        |       |        |       |        |       |        |       |        |       |        |       |        |       |        |       |
|-----------|------------|---------------------|--------------------|-----------------|----------------------------------------------|-------|----------|-------|--------|-------|--------|-------|--------|-------|--------|-------|--------|-------|--------|-------|--------|-------|--------|-------|--------|-------|--------|-------|
|           |            |                     |                    |                 | HZY261-L                                     |       | HZY261-H |       | ZZY8-L |       | ZZY8-H |       | JFY2-L |       | JFY2-H |       | YY15-L |       | YY15-H |       | JHX1-L |       | JHX1-H |       | NJ46-L |       | NJ46-H |       |
|           |            |                     |                    |                 | m                                            | sd    | m        | sd    | m      | sd    | m      | sd    | m      | sd    | m      | sd    | m      | sd    | m      | sd    | m      | sd    | m      | sd    | m      | sd    | m      | sd    |
| Aldehydes | 11         | pentanal dimer      | 180.682            | 1.41873         | 0.360                                        | 0.024 | 0.233    | 0.016 | 0.187  | 0.035 | 0.153  | 0.060 | 0.416  | 0.010 | 0.458  | 0.034 | 0.653  | 0.008 | 0.465  | 0.023 | 0.120  | 0.073 | 0.204  | 0.099 | 0.237  | 0.037 | 0.289  | 0.137 |
|           | 12         | pentanal            | 180.355            | 1.20197         | 0.817                                        | 0.020 | 0.554    | 0.026 | 0.486  | 0.047 | 0.517  | 0.087 | 0.764  | 0.030 | 0.869  | 0.042 | 1.011  | 0.003 | 1.077  | 0.008 | 0.411  | 0.175 | 0.591  | 0.184 | 0.575  | 0.095 | 0.697  | 0.266 |
|           | 17         | phenylacetaldehyde  | 646.207            | 1.26414         | 0.098                                        | 0.004 | 0.125    | 0.002 | 0.106  | 0.007 | 0.096  | 0.003 | 0.261  | 0.011 | 0.188  | 0.003 | 0.196  | 0.001 | 0.184  | 0.004 | 0.104  | 0.008 | 0.128  | 0.002 | 0.126  | 0.007 | 0.128  | 0.005 |
|           | 23         | 2-pentenal (E)      | 232.182            | 1.122           | 0.524                                        | 0.000 | 0.739    | 0.018 | 0.771  | 0.096 | 0.737  | 0.182 | 0.918  | 0.022 | 0.640  | 0.035 | 0.560  | 0.001 | 0.311  | 0.003 | 0.486  | 0.218 | 0.951  | 0.368 | 1.010  | 0.073 | 0.913  | 0.421 |
|           | 27         | 2-nonenal (E)       | 921.024            | 1.40658         | 0.192                                        | 0.001 | 0.330    | 0.003 | 0.251  | 0.006 | 0.220  | 0.005 | 0.226  | 0.000 | 0.178  | 0.012 | 0.145  | 0.001 | 0.137  | 0.000 | 0.168  | 0.010 | 0.246  | 0.020 | 0.162  | 0.000 | 0.140  | 0.007 |
|           | 28         | 2-furfural          | 303.343            | 1.09822         | 0.190                                        | 0.009 | 0.186    | 0.007 | 0.219  | 0.002 | 0.178  | 0.007 | 0.154  | 0.003 | 0.125  | 0.007 | 0.124  | 0.004 | 0.115  | 0.001 | 0.172  | 0.042 | 0.120  | 0.009 | 0.108  | 0.001 | 0.123  | 0.012 |
|           | 37         | (E)-2-hexenal dimer | 321.762            | 1.51364         | 0.079                                        | 0.003 | 0.109    | 0.009 | 0.089  | 0.005 | 0.096  | 0.018 | 0.098  | 0.009 | 0.082  | 0.024 | 0.072  | 0.002 | 0.067  | 0.003 | 0.128  | 0.008 | 0.084  | 0.004 | 0.093  | 0.001 | 0.070  | 0.001 |
|           | 38         | (E)-2-hexenal       | 324.733            | 1.17923         | 0.280                                        | 0.002 | 0.372    | 0.001 | 0.326  | 0.007 | 0.345  | 0.009 | 0.404  | 0.016 | 0.325  | 0.044 | 0.349  | 0.003 | 0.324  | 0.004 | 0.427  | 0.021 | 0.353  | 0.009 | 0.380  | 0.021 | 0.262  | 0.002 |
|           | 39         | benzaldehyde dimer  | 511.975            | 1.46856         | 0.179                                        | 0.011 | 0.206    | 0.011 | 0.163  | 0.004 | 0.177  | 0.003 | 0.164  | 0.005 | 0.160  | 0.021 | 0.150  | 0.006 | 0.197  | 0.009 | 0.186  | 0.016 | 0.176  | 0.005 | 0.141  | 0.001 | 0.151  | 0.004 |
|           | 40         | benzaldehyde        | 512.482            | 1.14934         | 0.944                                        | 0.034 | 1.015    | 0.009 | 0.854  | 0.004 | 0.870  | 0.003 | 0.848  | 0.038 | 0.807  | 0.041 | 0.762  | 0.001 | 0.965  | 0.013 | 0.908  | 0.041 | 0.922  | 0.001 | 0.681  | 0.000 | 0.742  | 0.007 |
|           | 41         | butanal dimer       | 136.246            | 1.28694         | 0.689                                        | 0.000 | 0.255    | 0.022 | 0.212  | 0.006 | 0.419  | 0.013 | 0.566  | 0.005 | 0.636  | 0.060 | 0.464  | 0.050 | 0.395  | 0.009 | 0.499  | 0.043 | 0.660  | 0.078 | 0.471  | 0.098 | 0.083  | 0.017 |
|           | 42         | butanal             | 134.12             | 1.10788         | 2.193                                        | 0.034 | 2.169    | 0.072 | 2.077  | 0.007 | 2.160  | 0.021 | 2.007  | 0.051 | 1.988  | 0.008 | 1.989  | 0.005 | 2.130  | 0.040 | 2.081  | 0.047 | 1.792  | 0.086 | 1.341  | 0.034 | 0.357  | 0.054 |

|          |    |                     |         |             |           |           |           |           |           |           |           |           |           |           |           |           |           |           |           |           |           |           |           |           |           |           |           |           |
|----------|----|---------------------|---------|-------------|-----------|-----------|-----------|-----------|-----------|-----------|-----------|-----------|-----------|-----------|-----------|-----------|-----------|-----------|-----------|-----------|-----------|-----------|-----------|-----------|-----------|-----------|-----------|-----------|
|          | 43 | heptanal dimer      | 384.742 | 1.6860<br>1 | 0.68<br>2 | 0.00<br>9 | 0.62<br>0 | 0.01<br>1 | 0.39<br>6 | 0.00<br>4 | 0.79<br>9 | 0.00<br>8 | 0.56<br>0 | 0.02<br>4 | 0.56<br>0 | 0.02<br>3 | 0.69<br>2 | 0.00<br>2 | 0.52<br>5 | 0.01<br>0 | 0.41<br>8 | 0.02<br>5 | 0.64<br>6 | 0.00<br>3 | 0.58<br>8 | 0.01<br>3 | 0.67<br>0 | 0.04<br>1 |
|          | 44 | heptanal            | 385.337 | 1.3447<br>1 | 0.77<br>3 | 0.03<br>2 | 0.82<br>9 | 0.01<br>9 | 0.62<br>8 | 0.00<br>8 | 0.95<br>3 | 0.00<br>2 | 0.75<br>4 | 0.00<br>9 | 0.76<br>1 | 0.00<br>3 | 0.88<br>6 | 0.00<br>2 | 0.87<br>2 | 0.00<br>2 | 0.67<br>8 | 0.01<br>6 | 0.83<br>5 | 0.03<br>1 | 0.76<br>1 | 0.04<br>9 | 0.93<br>1 | 0.00<br>4 |
|          | 45 | hexanal dimer       | 260.575 | 1.5568<br>5 | 4.17<br>9 | 0.05<br>1 | 3.98<br>5 | 0.02<br>9 | 3.76<br>3 | 0.06<br>5 | 4.05<br>9 | 0.10<br>4 | 4.24<br>6 | 0.06<br>0 | 4.34<br>8 | 0.05<br>4 | 4.38<br>1 | 0.00<br>9 | 4.55<br>9 | 0.02<br>7 | 3.36<br>0 | 0.24<br>4 | 4.09<br>0 | 0.15<br>8 | 4.01<br>5 | 0.11<br>0 | 4.28<br>0 | 0.21<br>2 |
|          | 46 | hexanal             | 261.538 | 1.2685      | 1.51<br>7 | 0.01<br>3 | 1.45<br>2 | 0.00<br>9 | 1.43<br>0 | 0.02<br>4 | 1.52<br>8 | 0.03<br>3 | 1.49<br>9 | 0.03<br>5 | 1.54<br>7 | 0.01<br>9 | 1.54<br>6 | 0.00<br>8 | 1.68<br>0 | 0.02<br>1 | 1.30<br>4 | 0.06<br>8 | 1.49<br>5 | 0.04<br>4 | 1.44<br>1 | 0.03<br>0 | 1.53<br>7 | 0.05<br>5 |
|          | 47 | n-nonanal dimer     | 792.12  | 1.9406<br>6 | 1.11<br>6 | 0.00<br>1 | 1.46<br>0 | 0.00<br>9 | 1.02<br>6 | 0.00<br>8 | 1.35<br>4 | 0.02<br>8 | 0.90<br>2 | 0.04<br>1 | 0.94<br>4 | 0.01<br>0 | 0.95<br>1 | 0.00<br>9 | 1.05<br>5 | 0.00<br>2 | 1.05<br>2 | 0.06<br>8 | 1.32<br>8 | 0.09<br>2 | 0.99<br>2 | 0.01<br>1 | 1.11<br>9 | 0.04<br>0 |
|          | 48 | n-nonanal           | 792.12  | 1.4823<br>4 | 1.54<br>8 | 0.01<br>2 | 1.55<br>5 | 0.00<br>5 | 1.51<br>0 | 0.00<br>2 | 1.58<br>2 | 0.00<br>4 | 1.54<br>5 | 0.00<br>6 | 1.56<br>3 | 0.00<br>1 | 1.56<br>1 | 0.00<br>3 | 1.61<br>4 | 0.00<br>3 | 1.47<br>9 | 0.02<br>5 | 1.57<br>6 | 0.03<br>3 | 1.52<br>6 | 0.01<br>2 | 1.59<br>0 | 0.00<br>3 |
|          | 49 | octanal dimer       | 579.763 | 1.8143<br>2 | 0.14<br>4 | 0.00<br>0 | 0.15<br>7 | 0.00<br>2 | 0.10<br>1 | 0.00<br>3 | 0.22<br>5 | 0.01<br>0 | 0.18<br>9 | 0.00<br>4 | 0.20<br>3 | 0.00<br>0 | 0.29<br>1 | 0.00<br>4 | 0.19<br>1 | 0.00<br>1 | 0.16<br>2 | 0.00<br>9 | 0.24<br>5 | 0.00<br>3 | 0.25<br>1 | 0.00<br>3 | 0.26<br>4 | 0.00<br>4 |
|          | 50 | octanal             | 582.166 | 1.4156<br>2 | 0.62<br>4 | 0.02<br>5 | 0.71<br>1 | 0.00<br>1 | 0.58<br>2 | 0.00<br>1 | 0.85<br>6 | 0.00<br>6 | 0.79<br>5 | 0.01<br>3 | 0.81<br>9 | 0.03<br>4 | 0.97<br>0 | 0.01<br>1 | 0.80<br>4 | 0.02<br>4 | 0.71<br>1 | 0.00<br>8 | 0.89<br>6 | 0.01<br>0 | 0.90<br>3 | 0.02<br>0 | 0.92<br>2 | 0.01<br>3 |
| Alcohols | 1  | 1-pentanol dimer    | 242.269 | 1.5148<br>7 | 0.34<br>6 | 0.00<br>3 | 0.17<br>7 | 0.00<br>9 | 0.23<br>1 | 0.02<br>4 | 0.14<br>9 | 0.01<br>9 | 0.54<br>8 | 0.02<br>0 | 0.55<br>5 | 0.01<br>7 | 0.49<br>9 | 0.00<br>3 | 0.30<br>3 | 0.00<br>9 | 0.15<br>0 | 0.03<br>8 | 0.25<br>8 | 0.05<br>2 | 0.37<br>1 | 0.03<br>3 | 0.27<br>0 | 0.08<br>8 |
|          | 2  | 1-pentanol          | 243.553 | 1.2519<br>3 | 1.06<br>1 | 0.00<br>5 | 0.75<br>6 | 0.02<br>8 | 0.84<br>5 | 0.05<br>5 | 0.80<br>8 | 0.06<br>6 | 1.23<br>3 | 0.01<br>0 | 1.27<br>5 | 0.02<br>8 | 1.22<br>0 | 0.00<br>3 | 1.06<br>5 | 0.00<br>9 | 0.58<br>9 | 0.08<br>4 | 0.88<br>8 | 0.11<br>1 | 1.02<br>2 | 0.07<br>2 | 0.94<br>4 | 0.19<br>1 |
|          | 9  | n-hexanol dimer     | 358.005 | 1.6446<br>4 | 0.44<br>1 | 0.02<br>2 | 0.25<br>0 | 0.00<br>7 | 0.38<br>6 | 0.01<br>2 | 0.18<br>3 | 0.00<br>4 | 0.76<br>4 | 0.00<br>3 | 0.70<br>3 | 0.02<br>8 | 0.55<br>9 | 0.01<br>5 | 0.38<br>8 | 0.02<br>0 | 0.32<br>1 | 0.03<br>6 | 0.38<br>3 | 0.02<br>2 | 0.64<br>8 | 0.01<br>2 | 0.35<br>4 | 0.05<br>5 |
|          | 10 | n-hexanol           | 359.194 | 1.3274<br>7 | 1.13<br>4 | 0.02<br>2 | 0.85<br>3 | 0.00<br>9 | 1.03<br>9 | 0.01<br>6 | 0.72<br>1 | 0.01<br>4 | 1.43<br>4 | 0.01<br>6 | 1.39<br>7 | 0.00<br>6 | 1.24<br>5 | 0.01<br>9 | 1.08<br>6 | 0.01<br>5 | 0.97<br>1 | 0.04<br>1 | 1.06<br>6 | 0.01<br>9 | 1.34<br>5 | 0.01<br>7 | 1.03<br>3 | 0.06<br>9 |
|          | 14 | 3-methylbutanol     | 216.711 | 1.2415<br>3 | 0.40<br>7 | 0.01<br>2 | 0.26<br>4 | 0.00<br>6 | 0.34<br>2 | 0.03<br>5 | 0.34<br>5 | 0.05<br>5 | 0.44<br>7 | 0.00<br>1 | 0.50<br>7 | 0.01<br>9 | 0.53<br>5 | 0.00<br>3 | 0.44<br>1 | 0.00<br>9 | 0.30<br>3 | 0.12<br>3 | 0.30<br>9 | 0.07<br>2 | 0.32<br>2 | 0.05<br>1 | 0.35<br>1 | 0.11<br>8 |
|          | 22 | 2-methyl-1-propanol | 151.608 | 1.1761<br>3 | 0.48<br>5 | 0.00<br>4 | 0.32<br>0 | 0.01<br>7 | 0.28<br>7 | 0.00<br>3 | 0.46<br>9 | 0.00<br>9 | 0.63<br>5 | 0.01<br>0 | 0.68<br>4 | 0.02<br>8 | 0.78<br>4 | 0.00<br>5 | 0.39<br>6 | 0.01<br>5 | 0.62<br>1 | 0.00<br>8 | 0.57<br>9 | 0.02<br>4 | 0.86<br>7 | 0.01<br>1 | 0.60<br>7 | 0.03<br>6 |
|          | 26 | 1-octanol           | 756.176 | 1.4747<br>6 | 0.25<br>6 | 0.00<br>8 | 0.24<br>7 | 0.00<br>6 | 0.20<br>8 | 0.00<br>9 | 0.20<br>2 | 0.00<br>8 | 0.16<br>6 | 0.00<br>2 | 0.15<br>0 | 0.01<br>0 | 0.13<br>9 | 0.00<br>2 | 0.13<br>7 | 0.00<br>3 | 0.15<br>7 | 0.00<br>1 | 0.17<br>3 | 0.01<br>1 | 0.16<br>6 | 0.00<br>5 | 0.14<br>6 | 0.00<br>1 |



|         |    |                         |          |             |           |           |           |           |           |           |           |           |           |           |           |           |           |           |           |           |           |           |           |           |           |           |           |           |
|---------|----|-------------------------|----------|-------------|-----------|-----------|-----------|-----------|-----------|-----------|-----------|-----------|-----------|-----------|-----------|-----------|-----------|-----------|-----------|-----------|-----------|-----------|-----------|-----------|-----------|-----------|-----------|-----------|
|         | 35 | 2-ethyl-1-hexanol dimer | 661.46   | 1.7915<br>4 | 0.42<br>5 | 0.00<br>1 | 0.46<br>5 | 0.02<br>6 | 0.37<br>2 | 0.01<br>9 | 0.43<br>3 | 0.00<br>1 | 0.35<br>5 | 0.00<br>3 | 0.45<br>7 | 0.02<br>9 | 0.44<br>4 | 0.00<br>4 | 0.38<br>3 | 0.02<br>0 | 0.40<br>5 | 0.06<br>4 | 0.44<br>1 | 0.01<br>6 | 0.37<br>6 | 0.01<br>9 | 0.36<br>2 | 0.01<br>3 |
|         | 36 | 2-ethyl-1-hexanol       | 660.002  | 1.4152<br>3 | 1.01<br>2 | 0.00<br>5 | 1.11<br>5 | 0.05<br>1 | 1.00<br>5 | 0.01<br>6 | 1.08<br>6 | 0.06<br>7 | 0.99<br>5 | 0.00<br>2 | 1.08<br>3 | 0.00<br>3 | 1.08<br>3 | 0.00<br>9 | 1.02<br>8 | 0.01<br>2 | 1.07<br>8 | 0.08<br>8 | 1.11<br>6 | 0.01<br>6 | 1.04<br>7 | 0.00<br>9 | 1.01<br>0 | 0.01<br>6 |
|         | 51 | 1-butanol               | 164.427  | 1.1808<br>7 | 1.25<br>3 | 0.05<br>4 | 0.83<br>2 | 0.00<br>4 | 0.75<br>6 | 0.00<br>5 | 1.10<br>8 | 0.01<br>4 | 1.16<br>4 | 0.02<br>7 | 1.33<br>9 | 0.02<br>9 | 1.25<br>7 | 0.00<br>3 | 1.04<br>6 | 0.04<br>5 | 1.09<br>2 | 0.02<br>7 | 1.08<br>8 | 0.00<br>5 | 1.21<br>5 | 0.01<br>9 | 1.36<br>0 | 0.00<br>3 |
|         | 53 | 1-nonanol               | 1046.829 | 1.549<br>5  | 0.12<br>3 | 0.00<br>8 | 0.14<br>8 | 0.00<br>2 | 0.12<br>8 | 0.00<br>0 | 0.16<br>4 | 0.00<br>1 | 0.17<br>0 | 0.00<br>2 | 0.15<br>6 | 0.00<br>1 | 0.16<br>3 | 0.00<br>1 | 0.15<br>1 | 0.00<br>1 | 0.15<br>1 | 0.00<br>1 | 0.16<br>8 | 0.00<br>8 | 0.15<br>5 | 0.00<br>0 | 0.16<br>8 | 0.00<br>1 |
|         | 54 | 1-octen-3-ol            | 549.006  | 1.1707<br>6 | 0.84<br>7 | 0.05<br>7 | 0.77<br>8 | 0.01<br>8 | 0.73<br>0 | 0.01<br>4 | 0.84<br>1 | 0.02<br>0 | 0.82<br>8 | 0.01<br>6 | 0.88<br>1 | 0.04<br>8 | 0.83<br>9 | 0.00<br>5 | 0.85<br>5 | 0.01<br>7 | 0.93<br>0 | 0.00<br>9 | 0.96<br>0 | 0.01<br>3 | 0.77<br>4 | 0.00<br>7 | 0.87<br>3 | 0.01<br>4 |
|         | 57 | (Z)-3-hexen-1-ol        | 342.757  | 1.2284<br>3 | 0.08<br>5 | 0.00<br>5 | 0.06<br>6 | 0.00<br>7 | 0.06<br>4 | 0.00<br>3 | 0.14<br>6 | 0.01<br>6 | 0.10<br>1 | 0.00<br>8 | 0.13<br>2 | 0.00<br>6 | 0.11<br>4 | 0.00<br>2 | 0.12<br>5 | 0.00<br>3 | 0.09<br>9 | 0.00<br>4 | 0.13<br>7 | 0.00<br>1 | 0.12<br>9 | 0.01<br>1 | 0.14<br>2 | 0.00<br>8 |
|         | 59 | ethanol                 | 95.915   | 1.0477<br>1 | 5.18<br>3 | 0.18<br>9 | 4.91<br>4 | 0.11<br>0 | 4.79<br>3 | 0.00<br>9 | 4.82<br>0 | 0.07<br>9 | 4.55<br>5 | 0.16<br>1 | 4.78<br>0 | 0.09<br>2 | 4.83<br>8 | 0.02<br>2 | 4.85<br>6 | 0.10<br>4 | 4.53<br>2 | 0.10<br>7 | 4.41<br>7 | 0.17<br>0 | 4.57<br>0 | 0.13<br>2 | 4.61<br>0 | 0.12<br>3 |
| Ketones | 3  | 2-heptanone dimer       | 368.106  | 1.6222<br>3 | 0.37<br>5 | 0.00<br>3 | 0.30<br>8 | 0.00<br>5 | 0.31<br>3 | 0.00<br>2 | 0.17<br>1 | 0.00<br>9 | 0.76<br>3 | 0.02<br>2 | 0.66<br>3 | 0.02<br>8 | 0.58<br>8 | 0.00<br>4 | 0.45<br>6 | 0.02<br>0 | 0.30<br>6 | 0.04<br>0 | 0.36<br>4 | 0.01<br>0 | 0.49<br>2 | 0.01<br>0 | 0.37<br>2 | 0.02<br>8 |
|         | 4  | 2-heptanone             | 372.265  | 1.2585<br>2 | 0.51<br>0 | 0.00<br>1 | 0.52<br>4 | 0.00<br>5 | 0.45<br>8 | 0.00<br>7 | 0.53<br>6 | 0.01<br>2 | 0.66<br>7 | 0.01<br>3 | 0.62<br>9 | 0.01<br>5 | 0.65<br>0 | 0.00<br>3 | 0.67<br>6 | 0.00<br>3 | 0.44<br>7 | 0.02<br>2 | 0.53<br>8 | 0.00<br>1 | 0.50<br>8 | 0.00<br>9 | 0.58<br>4 | 0.01<br>7 |
|         | 21 | 2-butanone              | 136.394  | 1.0713<br>9 | 0.24<br>4 | 0.00<br>9 | 0.09<br>2 | 0.00<br>2 | 0.08<br>2 | 0.01<br>4 | 0.15<br>6 | 0.03<br>8 | 0.19<br>5 | 0.00<br>9 | 0.24<br>3 | 0.01<br>9 | 0.31<br>4 | 0.01<br>0 | 0.24<br>5 | 0.00<br>1 | 0.13<br>3 | 0.00<br>2 | 0.29<br>4 | 0.00<br>2 | 0.53<br>3 | 0.03<br>1 | 0.50<br>2 | 0.09<br>6 |
|         | 24 | 3-pentanone             | 176.59   | 1.1222<br>7 | 0.45<br>9 | 0.00<br>5 | 0.54<br>4 | 0.00<br>0 | 0.51<br>9 | 0.04<br>2 | 0.59<br>9 | 0.06<br>3 | 0.66<br>1 | 0.00<br>9 | 0.52<br>7 | 0.00<br>2 | 0.52<br>2 | 0.00<br>6 | 0.46<br>9 | 0.00<br>3 | 0.62<br>7 | 0.12<br>7 | 0.74<br>3 | 0.11<br>0 | 0.72<br>8 | 0.03<br>1 | 0.71<br>4 | 0.15<br>7 |
|         | 29 | acetophenone            | 733.866  | 1.1906<br>8 | 0.26<br>2 | 0.03<br>1 | 0.24<br>2 | 0.01<br>4 | 0.22<br>3 | 0.00<br>2 | 0.21<br>5 | 0.00<br>2 | 0.17<br>7 | 0.00<br>2 | 0.17<br>5 | 0.00<br>9 | 0.18<br>0 | 0.00<br>1 | 0.17<br>5 | 0.00<br>3 | 0.20<br>9 | 0.01<br>3 | 0.18<br>4 | 0.00<br>4 | 0.17<br>8 | 0.00<br>3 | 0.17<br>0 | 0.00<br>1 |
|         | 52 | 1-hydroxy-2-propanone   | 158.128  | 1.0395<br>2 | 0.71<br>4 | 0.02<br>8 | 0.70<br>1 | 0.00<br>9 | 0.82<br>8 | 0.02<br>0 | 0.82<br>2 | 0.01<br>4 | 0.58<br>7 | 0.00<br>1 | 0.65<br>9 | 0.02<br>2 | 0.70<br>6 | 0.01<br>9 | 0.58<br>8 | 0.00<br>7 | 0.75<br>7 | 0.06<br>5 | 0.62<br>0 | 0.02<br>7 | 0.69<br>3 | 0.01<br>2 | 0.58<br>2 | 0.00<br>9 |
|         | 55 | 2-hexanone              | 249.655  | 1.1878<br>5 | 0.27<br>1 | 0.01<br>0 | 0.27<br>5 | 0.00<br>2 | 0.29<br>2 | 0.00<br>6 | 0.36<br>1 | 0.00<br>0 | 0.30<br>2 | 0.00<br>4 | 0.30<br>2 | 0.01<br>6 | 0.27<br>2 | 0.00<br>3 | 0.30<br>5 | 0.00<br>6 | 0.20<br>9 | 0.01<br>2 | 0.28<br>7 | 0.00<br>2 | 0.22<br>8 | 0.00<br>5 | 0.23<br>7 | 0.00<br>3 |
|         | 56 | 2-propanone             | 104.609  | 1.1196<br>6 | 3.89<br>4 | 0.08<br>4 | 3.40<br>8 | 0.04<br>7 | 3.05<br>9 | 0.02<br>2 | 2.86<br>4 | 0.08<br>1 | 3.79<br>0 | 0.08<br>5 | 4.12<br>0 | 0.05<br>4 | 4.25<br>2 | 0.03<br>1 | 4.01<br>0 | 0.02<br>5 | 3.74<br>3 | 0.04<br>3 | 4.09<br>6 | 0.10<br>7 | 4.09<br>4 | 0.06<br>0 | 4.51<br>1 | 0.06<br>9 |

|           |    |                      |         |             |           |           |           |           |           |           |           |           |           |           |           |           |           |           |           |           |           |           |           |           |           |           |           |           |
|-----------|----|----------------------|---------|-------------|-----------|-----------|-----------|-----------|-----------|-----------|-----------|-----------|-----------|-----------|-----------|-----------|-----------|-----------|-----------|-----------|-----------|-----------|-----------|-----------|-----------|-----------|-----------|-----------|
|           | 58 | cyclohexanone        | 383.554 | 1.1533<br>8 | 0.12<br>1 | 0.00<br>5 | 0.14<br>4 | 0.00<br>2 | 0.12<br>5 | 0.00<br>7 | 0.15<br>3 | 0.00<br>9 | 0.10<br>9 | 0.00<br>9 | 0.10<br>3 | 0.00<br>4 | 0.12<br>0 | 0.00<br>7 | 0.17<br>3 | 0.00<br>1 | 0.16<br>2 | 0.00<br>5 | 0.14<br>3 | 0.00<br>8 | 0.11<br>6 | 0.00<br>5 | 0.15<br>9 | 0.01<br>3 |
| Esters    | 15 | ethyl propanoate     | 189.387 | 1.1533<br>1 | 0.15<br>1 | 0.00<br>4 | 0.16<br>1 | 0.00<br>9 | 0.17<br>0 | 0.02<br>4 | 0.19<br>5 | 0.02<br>8 | 0.21<br>6 | 0.00<br>5 | 0.23<br>8 | 0.01<br>2 | 0.22<br>0 | 0.00<br>2 | 0.30<br>5 | 0.00<br>1 | 0.15<br>7 | 0.04<br>6 | 0.16<br>8 | 0.03<br>3 | 0.15<br>3 | 0.01<br>5 | 0.16<br>7 | 0.02<br>9 |
|           | 16 | methyl hexanoate     | 423.261 | 1.2805<br>1 | 0.12<br>9 | 0.00<br>0 | 0.10<br>7 | 0.00<br>3 | 0.09<br>3 | 0.00<br>5 | 0.13<br>9 | 0.00<br>5 | 0.16<br>0 | 0.00<br>5 | 0.17<br>3 | 0.00<br>8 | 0.18<br>3 | 0.00<br>0 | 0.17<br>2 | 0.00<br>3 | 0.13<br>1 | 0.00<br>9 | 0.13<br>3 | 0.00<br>3 | 0.12<br>9 | 0.00<br>3 | 0.14<br>2 | 0.00<br>6 |
|           | 25 | ethyl acrylate       | 193.967 | 1.1214<br>9 | 0.83<br>7 | 0.00<br>7 | 1.15<br>5 | 0.06<br>0 | 1.03<br>2 | 0.15<br>7 | 1.12<br>5 | 0.26<br>5 | 1.35<br>1 | 0.02<br>0 | 1.05<br>3 | 0.03<br>9 | 0.96<br>1 | 0.04<br>2 | 0.72<br>3 | 0.00<br>3 | 1.19<br>8 | 0.18<br>4 | 1.29<br>2 | 0.33<br>1 | 1.47<br>4 | 0.13<br>6 | 1.28<br>1 | 0.27<br>5 |
|           | 30 | ethyl acetate        | 141.825 | 1.3359<br>2 | 5.74<br>5 | 0.10<br>5 | 6.43<br>8 | 0.00<br>3 | 6.47<br>7 | 0.01<br>1 | 5.80<br>9 | 0.00<br>4 | 4.91<br>4 | 0.00<br>8 | 4.08<br>7 | 0.13<br>2 | 2.91<br>6 | 0.21<br>8 | 4.09<br>1 | 0.10<br>0 | 5.58<br>5 | 0.02<br>4 | 3.18<br>3 | 0.12<br>7 | 1.05<br>0 | 0.01<br>3 | 0.10<br>8 | 0.00<br>6 |
|           | 31 | propyl hexanoate     | 809.473 | 1.3857<br>5 | 0.17<br>5 | 0.01<br>3 | 0.19<br>0 | 0.01<br>2 | 0.17<br>3 | 0.00<br>4 | 0.15<br>9 | 0.01<br>3 | 0.15<br>9 | 0.00<br>9 | 0.14<br>0 | 0.00<br>5 | 0.13<br>7 | 0.00<br>2 | 0.12<br>7 | 0.00<br>3 | 0.11<br>8 | 0.00<br>3 | 0.13<br>2 | 0.00<br>4 | 0.13<br>9 | 0.01<br>6 | 0.12<br>5 | 0.00<br>1 |
| Alkenes   | 5  | 2-heptenal (E) dimer | 481.726 | 1.6605<br>4 | 0.47<br>5 | 0.15<br>6 | 0.23<br>3 | 0.00<br>1 | 0.17<br>6 | 0.00<br>3 | 0.16<br>7 | 0.00<br>1 | 0.35<br>1 | 0.02<br>0 | 0.26<br>0 | 0.00<br>5 | 0.29<br>8 | 0.00<br>1 | 0.26<br>8 | 0.01<br>5 | 0.23<br>0 | 0.04<br>9 | 0.19<br>3 | 0.00<br>5 | 0.19<br>7 | 0.00<br>3 | 0.17<br>9 | 0.03<br>9 |
|           | 6  | 2-heptenal (E)       | 487.012 | 1.2547<br>1 | 0.53<br>3 | 0.00<br>0 | 0.72<br>3 | 0.00<br>0 | 0.61<br>8 | 0.00<br>6 | 0.62<br>0 | 0.00<br>7 | 0.90<br>8 | 0.00<br>6 | 0.77<br>3 | 0.02<br>9 | 0.84<br>8 | 0.00<br>6 | 0.80<br>5 | 0.01<br>1 | 0.66<br>9 | 0.02<br>4 | 0.67<br>1 | 0.00<br>7 | 0.67<br>1 | 0.00<br>7 | 0.61<br>6 | 0.00<br>6 |
|           | 7  | 2-octenal (E) dimer  | 700.494 | 1.8079<br>6 | 0.09<br>9 | 0.00<br>4 | 0.14<br>6 | 0.00<br>1 | 0.10<br>3 | 0.00<br>3 | 0.10<br>9 | 0.00<br>4 | 0.21<br>2 | 0.01<br>7 | 0.18<br>9 | 0.01<br>2 | 0.19<br>7 | 0.00<br>3 | 0.15<br>9 | 0.01<br>1 | 0.12<br>1 | 0.02<br>4 | 0.14<br>5 | 0.00<br>3 | 0.13<br>1 | 0.00<br>5 | 0.11<br>5 | 0.01<br>0 |
|           | 8  | 2-octenal (E)        | 700.57  | 1.3308<br>8 | 0.32<br>8 | 0.00<br>6 | 0.40<br>1 | 0.00<br>4 | 0.35<br>0 | 0.00<br>1 | 0.30<br>8 | 0.00<br>2 | 0.62<br>0 | 0.01<br>5 | 0.49<br>9 | 0.01<br>4 | 0.50<br>4 | 0.00<br>8 | 0.47<br>9 | 0.00<br>2 | 0.31<br>6 | 0.02<br>2 | 0.36<br>4 | 0.01<br>6 | 0.39<br>2 | 0.02<br>0 | 0.37<br>2 | 0.01<br>9 |
| Pyrroles  | 20 | 2-acetyl-1-pyrroline | 429.229 | 1.1269<br>3 | 0.32<br>1 | 0.03<br>5 | 0.34<br>9 | 0.01<br>2 | 0.33<br>1 | 0.02<br>3 | 0.47<br>5 | 0.03<br>6 | 0.32<br>6 | 0.19<br>9 | 0.19<br>0 | 0.00<br>9 | 0.12<br>2 | 0.01<br>2 | 0.08<br>7 | 0.00<br>4 | 1.08<br>6 | 0.07<br>0 | 1.00<br>5 | 0.05<br>1 | 0.92<br>2 | 0.01<br>6 | 1.13<br>3 | 0.03<br>0 |
| Furans    | 13 | 2-pentylfuran        | 550.972 | 1.2498<br>2 | 0.49<br>4 | 0.01<br>7 | 0.46<br>3 | 0.00<br>4 | 0.44<br>3 | 0.00<br>0 | 0.30<br>9 | 0.00<br>3 | 0.73<br>6 | 0.02<br>1 | 0.59<br>5 | 0.00<br>9 | 0.62<br>5 | 0.00<br>7 | 0.46<br>3 | 0.01<br>7 | 0.28<br>6 | 0.01<br>6 | 0.40<br>4 | 0.00<br>7 | 0.53<br>0 | 0.00<br>6 | 0.37<br>8 | 0.02<br>0 |
| Undefined | 18 | ID_1                 | 540.356 | 1.4369<br>8 | 0.11<br>0 | 0.00<br>3 | 0.08<br>5 | 0.00<br>1 | 0.05<br>2 | 0.00<br>0 | 0.11<br>0 | 0.00<br>4 | 0.16<br>1 | 0.00<br>9 | 0.12<br>3 | 0.00<br>9 | 0.17<br>3 | 0.00<br>2 | 0.11<br>8 | 0.00<br>1 | 0.08<br>7 | 0.00<br>4 | 0.11<br>5 | 0.00<br>3 | 0.12<br>1 | 0.00<br>3 | 0.12<br>3 | 0.00<br>7 |
|           | 19 | ID_2                 | 550.561 | 1.6768<br>8 | 0.06<br>7 | 0.00<br>1 | 0.06<br>8 | 0.00<br>3 | 0.06<br>8 | 0.00<br>1 | 0.05<br>1 | 0.00<br>4 | 0.12<br>1 | 0.00<br>3 | 0.11<br>9 | 0.03<br>5 | 0.14<br>2 | 0.00<br>4 | 0.13<br>2 | 0.00<br>4 | 0.04<br>9 | 0.00<br>3 | 0.06<br>9 | 0.00<br>3 | 0.07<br>0 | 0.00<br>4 | 0.06<br>3 | 0.00<br>3 |
|           | 32 | ID_3                 | 134.386 | 1.1954<br>1 | 0.34<br>3 | 0.00<br>7 | 0.35<br>5 | 0.04<br>3 | 0.32<br>8 | 0.02<br>4 | 0.35<br>0 | 0.02<br>5 | 0.26<br>4 | 0.00<br>3 | 0.23<br>6 | 0.00<br>3 | 0.20<br>7 | 0.00<br>4 | 0.25<br>9 | 0.00<br>2 | 0.29<br>8 | 0.01<br>8 | 0.20<br>9 | 0.00<br>2 | 0.14<br>2 | 0.01<br>5 | 0.14<br>6 | 0.01<br>6 |

|  |    |      |         |             |           |           |           |           |           |           |           |           |           |           |           |           |           |           |           |           |           |           |           |           |           |           |           |           |
|--|----|------|---------|-------------|-----------|-----------|-----------|-----------|-----------|-----------|-----------|-----------|-----------|-----------|-----------|-----------|-----------|-----------|-----------|-----------|-----------|-----------|-----------|-----------|-----------|-----------|-----------|-----------|
|  | 33 | ID_4 | 116.584 | 1.1946      | 0.15<br>7 | 0.00<br>8 | 0.30<br>9 | 0.02<br>3 | 0.51<br>3 | 0.01<br>2 | 0.13<br>4 | 0.00<br>1 | 0.14<br>9 | 0.01<br>9 | 0.14<br>3 | 0.01<br>4 | 0.18<br>8 | 0.00<br>2 | 0.08<br>8 | 0.01<br>9 | 0.14<br>0 | 0.00<br>8 | 0.17<br>2 | 0.01<br>4 | 0.16<br>6 | 0.04<br>0 | 0.16<br>4 | 0.02<br>1 |
|  | 34 | ID_5 | 112.333 | 1.1568<br>6 | 0.34<br>5 | 0.00<br>7 | 0.66<br>9 | 0.01<br>9 | 0.87<br>2 | 0.00<br>3 | 0.47<br>9 | 0.09<br>5 | 0.17<br>6 | 0.00<br>8 | 0.18<br>1 | 0.00<br>9 | 0.24<br>2 | 0.01<br>8 | 0.11<br>1 | 0.00<br>0 | 0.45<br>1 | 0.08<br>2 | 0.22<br>5 | 0.00<br>3 | 0.24<br>2 | 0.14<br>8 | 0.12<br>3 | 0.00<br>5 |

<sup>a</sup> HZY261-L and HZY261-H, Huazheyou261 with the lowest and highest flavor of cooked rice in sensory evaluation values, respectively; ZZY8-L and ZZY8-H, Zhongzheyoun8 with the lowest and highest flavor of cooked rice in sensory evaluation values, respectively; JFY2-L and JFY2-H, Jiafengyou2 with the lowest and highest flavor of cooked rice in sensory evaluation values, respectively; YY15-L and YY15-H, Yongyou15 with the lowest and highest flavor of cooked rice in sensory evaluation values, respectively; JHX1-L and JHX1-H, Jiahexiang1 with the lowest and highest flavor of cooked rice in sensory evaluation values, respectively; NJ46-L and NJ46-H, Nanjing46 with the lowest and highest flavor of cooked rice in sensory evaluation values, respectively.
